# Supplementary material for: Genome-wide association study identifies two new susceptibility loci for colorectal cancer at 5q23.3 and 17q12 in Han Chinese
Source: PubMed Central journal article supplement (PMC4741898; doi:10.18632/oncotarget.5530), 2015-10-26
Supplement: oncotarget-06-40327-s001.pdf [file oncotarget-06-40327-s001.pdf]

SUPPLEMENTARY FIGURES AND TABLES

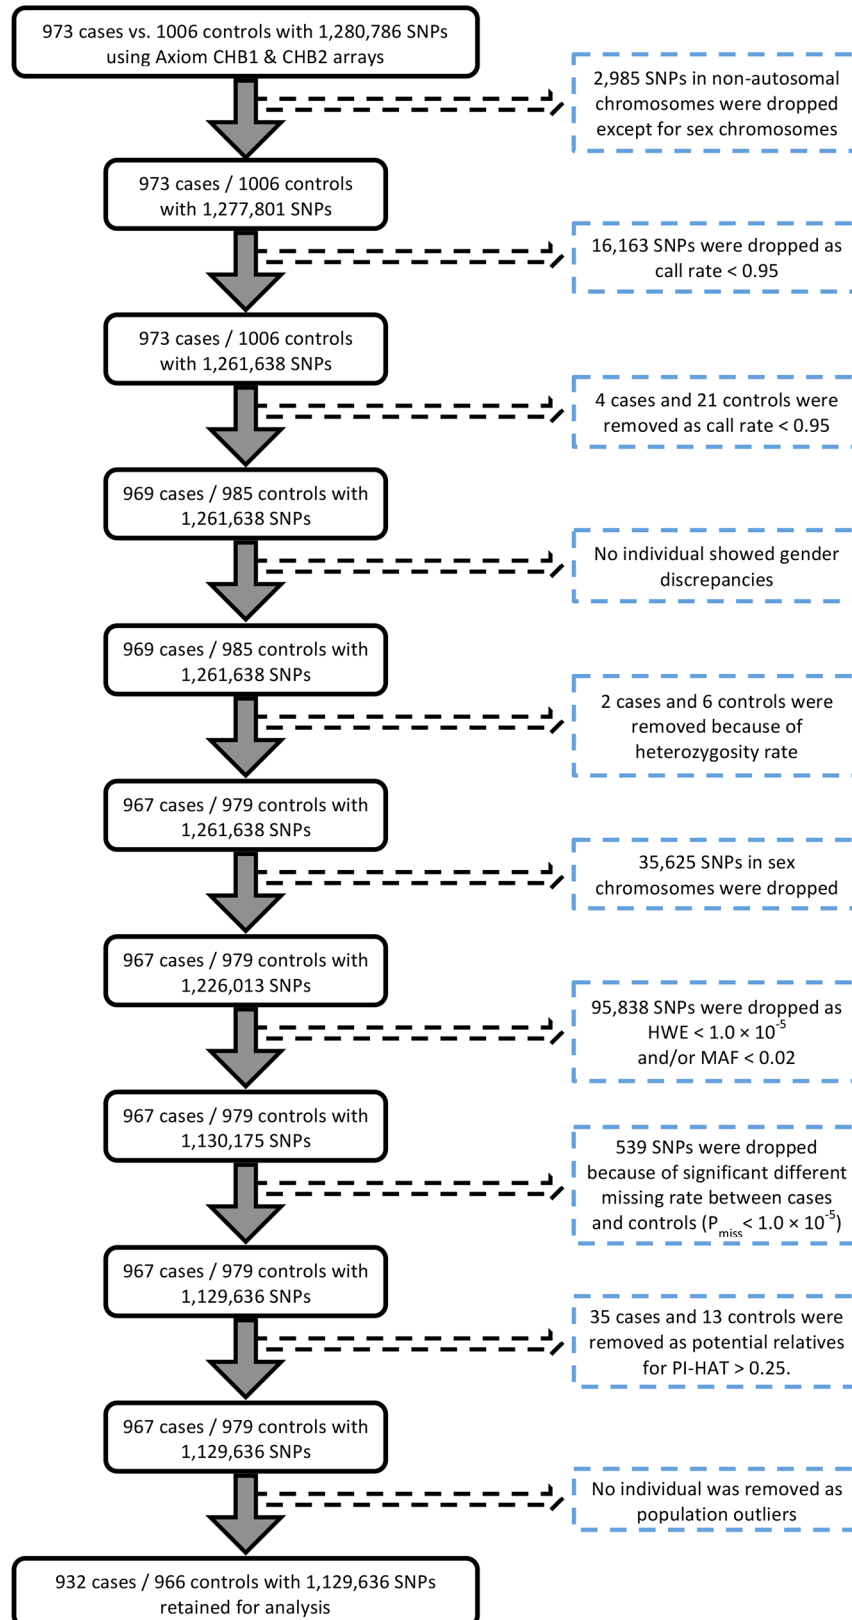

Supplementary Figure S1: A flow diagram showing the quality control process of the GWA scan.

(A) Our samples and the HapMap Phase II data

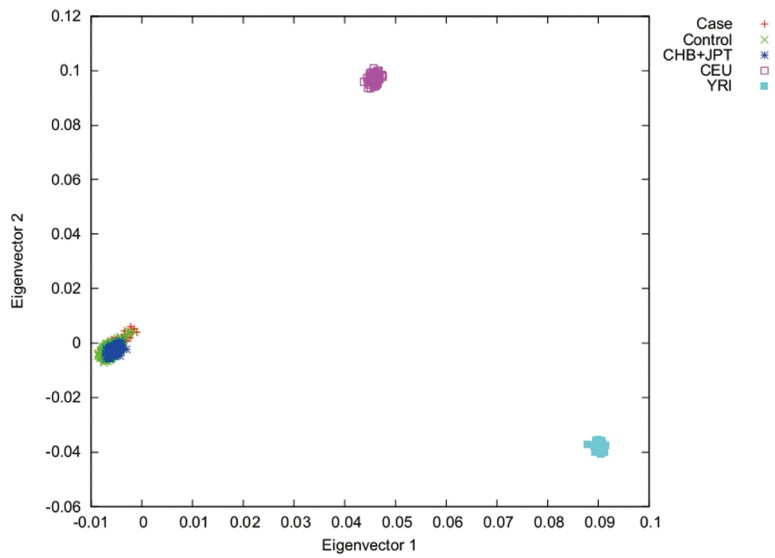

(B) Our samples

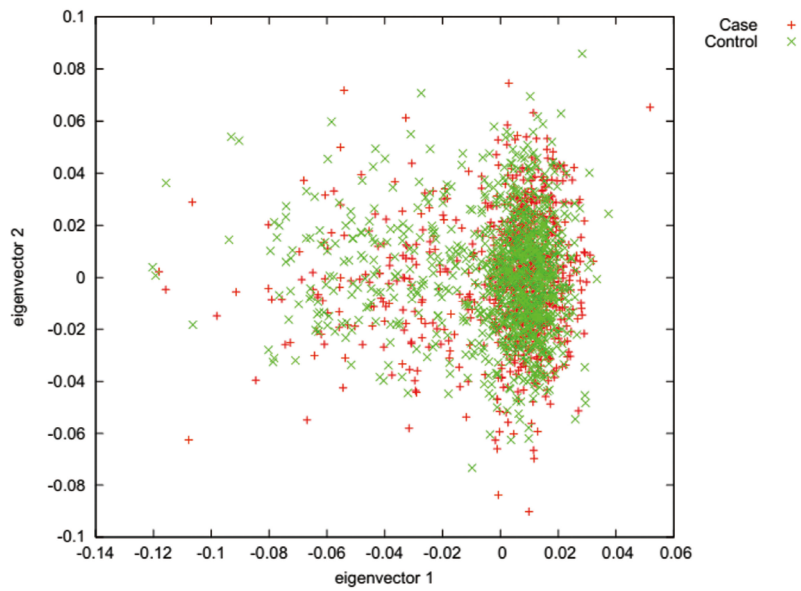

Supplementary Figure S2: Principal component analysis showing minimal evidence of population stratification.

**Supplementary Table S1: Summary description of the subjects used in this study**

| Variables | GWA scan      |               | Replication I |               | Replication II |               |
|-----------|---------------|---------------|---------------|---------------|----------------|---------------|
|           | case(932)     | control(966)  | case(1759)    | control(1875) | case(943)      | control(1838) |
| Age       | 61.76 ± 13.75 | 60.98 ± 12.91 | 60.16 ± 12.75 | 60.04 ± 13.05 | 59.46 ± 12.71  | 59.20 ± 15.26 |
| Sex       |               |               |               |               |                |               |
| Male      | 547(58.7%)    | 490(50.7%)    | 1069(60.8%)   | 1119(59.7%)   | 572(60.7%)     | 1114(60.6%)   |
| Female    | 385(41.3%)    | 476(49.3%)    | 690(39.2%)    | 756(40.3%)    | 371(39.3%)     | 724(39.4%)    |

**Supplementary Table S2: Associations of the 51 SNPs with CRC in the GWA scan and the phase I validation**

| SNP                | CHR | BP        | Study         | MAF  |         | OR <sup>b</sup> | L95 <sup>b</sup> | U95 <sup>b</sup> | P <sup>b</sup> |
|--------------------|-----|-----------|---------------|------|---------|-----------------|------------------|------------------|----------------|
|                    |     |           |               | Case | Control |                 |                  |                  |                |
| rs3761685          | 1   | 160084643 | GWAS          | 0.17 | 0.12    | 1.52            | 1.26             | 1.84             | 9.78E-06       |
| T > C <sup>a</sup> | 1   | 160084643 | Replication I | 0.14 | 0.15    | 0.95            | 0.83             | 1.09             | 4.63E-01       |
| rs117979405        | 1   | 211643475 | GWAS          | 0.07 | 0.04    | 2.02            | 1.50             | 2.73             | 4.53E-06       |
| C > T <sup>a</sup> | 1   | 211643475 | Replication I | 0.05 | 0.05    | 1.03            | 0.83             | 1.28             | 7.61E-01       |
| rs3767255          | 1   | 215781574 | GWAS          | 0.48 | 0.41    | 1.34            | 1.18             | 1.53             | 1.20E-05       |
| T > C <sup>a</sup> | 1   | 215781574 | Replication I | 0.46 | 0.48    | 0.92            | 0.84             | 1.00             | 5.94E-02       |
| rs117071032        | 2   | 10885819  | GWAS          | 0.04 | 0.08    | 0.54            | 0.41             | 0.72             | 2.32E-05       |
| T > C <sup>a</sup> | 2   | 10885819  | Replication I | 0.06 | 0.07    | 0.93            | 0.77             | 1.13             | 4.87E-01       |
| rs10195641         | 2   | 16740367  | GWAS          | 0.28 | 0.22    | 1.38            | 1.18             | 1.60             | 4.00E-05       |
| T > C <sup>a</sup> | 2   | 16740367  | Replication I | 0.25 | 0.25    | 1.03            | 0.93             | 1.14             | 6.04E-01       |
| rs13063805         | 3   | 41021433  | GWAS          | 0.33 | 0.27    | 1.33            | 1.15             | 1.53             | 7.55E-05       |
| A > G <sup>a</sup> | 3   | 41021433  | Replication I | 0.29 | 0.28    | 1.04            | 0.94             | 1.16             | 3.97E-01       |
| rs117446021        | 3   | 41939699  | GWAS          | 0.05 | 0.08    | 0.57            | 0.44             | 0.75             | 6.23E-05       |
| C > A <sup>a</sup> | 3   | 41939699  | Replication I | 0.06 | 0.06    | 0.93            | 0.76             | 1.13             | 4.50E-01       |
| rs66759638         | 4   | 169417371 | GWAS          | 0.11 | 0.16    | 0.66            | 0.54             | 0.80             | 2.15E-05       |
| T > C <sup>a</sup> | 4   | 169417371 | Replication I | 0.14 | 0.15    | 0.92            | 0.81             | 1.05             | 2.07E-01       |
| rs413665           | 5   | 5609639   | GWAS          | 0.03 | 0.06    | 0.51            | 0.37             | 0.71             | 3.78E-05       |
| A > G <sup>a</sup> | 5   | 5609639   | Replication I | 0.04 | 0.05    | 0.84            | 0.67             | 1.05             | 1.24E-01       |
| rs11948748         | 5   | 18853732  | GWAS          | 0.06 | 0.03    | 1.98            | 1.43             | 2.74             | 3.99E-05       |
| G > T <sup>a</sup> | 5   | 18853732  | Replication I | 0.04 | 0.04    | 0.96            | 0.76             | 1.22             | 7.60E-01       |
| rs31015            | 5   | 96441576  | GWAS          | 0.18 | 0.14    | 1.43            | 1.20             | 1.71             | 7.76E-05       |
| G > A <sup>a</sup> | 5   | 96441576  | Replication I | 0.15 | 0.17    | 0.92            | 0.81             | 1.04             | 1.68E-01       |
| rs12516376         | 5   | 129720170 | GWAS          | 0.19 | 0.14    | 1.56            | 1.30             | 1.87             | 1.50E-06       |
| T > C <sup>a</sup> | 5   | 129720170 | Replication I | 0.16 | 0.16    | 1.03            | 0.91             | 1.17             | 6.49E-01       |
| rs10035791         | 5   | 129891761 | GWAS          | 0.17 | 0.13    | 1.51            | 1.25             | 1.82             | 1.54E-05       |
| G > A <sup>a</sup> | 5   | 129891761 | Replication I | 0.16 | 0.14    | 1.17            | 1.03             | 1.33             | 1.98E-02*      |
| rs12522693         | 5   | 130195731 | GWAS          | 0.15 | 0.10    | 1.55            | 1.27             | 1.89             | 1.86E-05       |

(Continued)

| SNP                | CHR | BP        | Study         | MAF  |         | OR <sup>b</sup> | L95 <sup>b</sup> | U95 <sup>b</sup> | P <sup>b</sup> |
|--------------------|-----|-----------|---------------|------|---------|-----------------|------------------|------------------|----------------|
|                    |     |           |               | Case | Control |                 |                  |                  |                |
| G > A <sup>a</sup> | 5   | 130195731 | Replication I | 0.13 | 0.11    | 1.27            | 1.10             | 1.46             | 1.10E-03*      |
| rs80007597         | 5   | 130221632 | GWAS          | 0.14 | 0.09    | 1.59            | 1.29             | 1.96             | 1.16E-05       |
| G > C <sup>a</sup> | 5   | 130221632 | Replication I | 0.13 | 0.10    | 1.25            | 1.08             | 1.45             | 2.73E-03*      |
| rs10900799         | 5   | 130539728 | GWAS          | 0.13 | 0.09    | 1.56            | 1.26             | 1.93             | 4.74E-05       |
| A > G <sup>a</sup> | 5   | 130539728 | Replication I | 0.12 | 0.11    | 1.12            | 0.97             | 1.29             | 1.18E-01       |
| rs3778032          | 6   | 100883851 | GWAS          | 0.38 | 0.44    | 0.75            | 0.66             | 0.86             | 2.88E-05       |
| T > G <sup>a</sup> | 6   | 100883851 | Replication I | 0.41 | 0.42    | 0.99            | 0.90             | 1.08             | 7.84E-01       |
| rs9371582          | 6   | 152632823 | GWAS          | 0.21 | 0.16    | 1.45            | 1.22             | 1.72             | 2.81E-05       |
| C > T <sup>a</sup> | 6   | 152632823 | Replication I | 0.17 | 0.19    | 0.92            | 0.81             | 1.03             | 1.59E-01       |
| rs2107814          | 7   | 10280986  | GWAS          | 0.26 | 0.33    | 0.71            | 0.61             | 0.82             | 2.66E-06       |
| C > A <sup>a</sup> | 7   | 10280986  | Replication I | 0.30 | 0.29    | 1.04            | 0.94             | 1.15             | 4.51E-01       |
| rs57662641         | 8   | 1226396   | GWAS          | 0.31 | 0.25    | 1.33            | 1.15             | 1.54             | 9.33E-05       |
| T > C <sup>a</sup> | 8   | 1226396   | Replication I | 0.27 | 0.28    | 0.97            | 0.87             | 1.08             | 5.69E-01       |
| rs1458126          | 8   | 87865200  | GWAS          | 0.22 | 0.17    | 1.41            | 1.19             | 1.66             | 4.54E-05       |
| G > A <sup>a</sup> | 8   | 87865200  | Replication I | 0.20 | 0.20    | 0.96            | 0.86             | 1.08             | 5.47E-01       |
| rs76257136         | 8   | 109907339 | GWAS          | 0.04 | 0.07    | 0.55            | 0.40             | 0.74             | 8.84E-05       |
| G > A <sup>a</sup> | 8   | 109907339 | Replication I | 0.05 | 0.06    | 0.94            | 0.77             | 1.15             | 5.47E-01       |
| rs6983267          | 8   | 128413305 | GWAS          | 0.47 | 0.42    | 1.18            | 1.04             | 1.35             | 1.24E-02       |
| T > G <sup>a</sup> | 8   | 128413305 | Replication I | 0.45 | 0.42    | 1.11            | 1.01             | 1.22             | 2.88E-02*      |
| rs76250944         | 9   | 4307649   | GWAS          | 0.11 | 0.07    | 1.65            | 1.30             | 2.10             | 3.87E-05       |
| T > G <sup>a</sup> | 9   | 4307649   | Replication I | 0.08 | 0.09    | 0.88            | 0.75             | 1.03             | 1.20E-01       |
| rs77249765         | 9   | 28592212  | GWAS          | 0.06 | 0.10    | 0.60            | 0.47             | 0.76             | 3.73E-05       |
| C > T <sup>a</sup> | 9   | 28592212  | Replication I | 0.08 | 0.08    | 0.93            | 0.79             | 1.10             | 3.87E-01       |
| rs143237349        | 9   | 103647166 | GWAS          | 0.06 | 0.10    | 0.61            | 0.48             | 0.78             | 6.62E-05       |
| G > A <sup>a</sup> | 9   | 103647166 | Replication I | 0.08 | 0.07    | 1.07            | 0.90             | 1.28             | 4.37E-01       |
| rs10795668         | 10  | 8701219   | GWAS          | 0.32 | 0.35    | 0.85            | 0.74             | 0.97             | 1.82E-02       |
| G > A <sup>a</sup> | 10  | 8701219   | Replication I | 0.34 | 0.38    | 0.88            | 0.80             | 0.97             | 7.30E-03*      |
| rs3812699          | 10  | 72071648  | GWAS          | 0.45 | 0.39    | 1.32            | 1.16             | 1.51             | 4.25E-05       |
| A > G <sup>a</sup> | 10  | 72071648  | Replication I | 0.43 | 0.42    | 1.03            | 0.93             | 1.13             | 5.92E-01       |
| rs4570507          | 10  | 72153946  | GWAS          | 0.40 | 0.34    | 1.31            | 1.14             | 1.50             | 9.26E-05       |
| G > A <sup>a</sup> | 10  | 72153946  | Replication I | 0.36 | 0.37    | 0.96            | 0.88             | 1.06             | 4.46E-01       |
| rs16927648         | 10  | 72207860  | GWAS          | 0.44 | 0.38    | 1.33            | 1.16             | 1.52             | 3.95E-05       |
| A > C <sup>a</sup> | 10  | 72207860  | Replication I | 0.39 | 0.39    | 0.98            | 0.89             | 1.07             | 6.21E-01       |
| rs6858             | 10  | 81142365  | GWAS          | 0.48 | 0.42    | 1.33            | 1.16             | 1.51             | 3.45E-05       |
| A > G <sup>a</sup> | 10  | 81142365  | Replication I | 0.42 | 0.44    | 0.94            | 0.85             | 1.03             | 1.57E-01       |
| rs1605871          | 11  | 24640181  | GWAS          | 0.25 | 0.31    | 0.74            | 0.65             | 0.86             | 5.30E-05       |

(Continued)

| SNP                | CHR | BP        | Study         | MAF  |         | OR <sup>b</sup> | L95 <sup>b</sup> | U95 <sup>b</sup> | P <sup>b</sup> |
|--------------------|-----|-----------|---------------|------|---------|-----------------|------------------|------------------|----------------|
|                    |     |           |               | Case | Control |                 |                  |                  |                |
| T > C <sup>a</sup> | 11  | 24640181  | Replication I | 0.28 | 0.28    | 1.00            | 0.91             | 1.11             | 9.55E-01       |
| rs2509928          | 11  | 58405458  | GWAS          | 0.35 | 0.41    | 0.75            | 0.66             | 0.86             | 3.54E-05       |
| T > C <sup>a</sup> | 11  | 58405458  | Replication I | 0.37 | 0.37    | 0.99            | 0.90             | 1.08             | 7.88E-01       |
| rs80273176         | 11  | 127847209 | GWAS          | 0.15 | 0.21    | 0.69            | 0.58             | 0.82             | 2.00E-05       |
| C > T <sup>a</sup> | 11  | 127847209 | Replication I | 0.16 | 0.18    | 0.87            | 0.76             | 0.98             | 2.23E-02*      |
| rs1944853          | 11  | 128571644 | GWAS          | 0.13 | 0.09    | 1.56            | 1.26             | 1.94             | 4.63E-05       |
| C > A <sup>a</sup> | 11  | 128571644 | Replication I | 0.11 | 0.10    | 1.07            | 0.92             | 1.25             | 3.76E-01       |
| rs7974919          | 12  | 116174409 | GWAS          | 0.46 | 0.39    | 1.32            | 1.16             | 1.51             | 3.05E-05       |
| C > T <sup>a</sup> | 12  | 116174409 | Replication I | 0.41 | 0.43    | 0.93            | 0.85             | 1.02             | 1.16E-01       |
| rs10507535         | 13  | 46230860  | GWAS          | 0.33 | 0.39    | 0.76            | 0.66             | 0.87             | 5.44E-05       |
| G > A <sup>a</sup> | 13  | 46230860  | Replication I | 0.36 | 0.37    | 0.97            | 0.88             | 1.07             | 5.52E-01       |
| rs4143042          | 13  | 49493648  | GWAS          | 0.51 | 0.44    | 1.34            | 1.17             | 1.53             | 1.67E-05       |
| C > T <sup>a</sup> | 13  | 49493648  | Replication I | 0.47 | 0.47    | 1.00            | 0.91             | 1.09             | 9.36E-01       |
| rs1449582          | 13  | 49498326  | GWAS          | 0.44 | 0.38    | 1.31            | 1.15             | 1.50             | 6.25E-05       |
| T > C <sup>a</sup> | 13  | 49498326  | Replication I | 0.41 | 0.42    | 0.94            | 0.85             | 1.03             | 1.68E-01       |
| rs7319398          | 13  | 71439474  | GWAS          | 0.46 | 0.53    | 0.76            | 0.66             | 0.87             | 3.80E-05       |
| A > G <sup>a</sup> | 13  | 71439474  | Replication I | 0.48 | 0.49    | 0.97            | 0.88             | 1.06             | 4.78E-01       |
| rs12886318         | 14  | 40198925  | GWAS          | 0.12 | 0.17    | 0.65            | 0.54             | 0.79             | 9.05E-06       |
| T > C <sup>a</sup> | 14  | 40198925  | Replication I | 0.15 | 0.14    | 1.10            | 0.97             | 1.25             | 1.45E-01       |
| rs17109774         | 14  | 40215686  | GWAS          | 0.23 | 0.31    | 0.68            | 0.58             | 0.79             | 3.51E-07       |
| G > A <sup>a</sup> | 14  | 40215686  | Replication I | 0.26 | 0.26    | 1.03            | 0.92             | 1.14             | 6.47E-01       |
| rs4899424          | 14  | 40229496  | GWAS          | 0.38 | 0.44    | 0.76            | 0.67             | 0.87             | 3.87E-05       |
| G > A <sup>a</sup> | 14  | 40229496  | Replication I | 0.39 | 0.40    | 0.95            | 0.86             | 1.04             | 2.84E-01       |
| rs17836917         | 17  | 32047282  | GWAS          | 0.08 | 0.11    | 0.64            | 0.51             | 0.80             | 6.15E-05       |
| G > A <sup>a</sup> | 17  | 32047282  | Replication I | 0.09 | 0.12    | 0.79            | 0.68             | 0.92             | 1.80E-03*      |
| rs12939240         | 17  | 54707917  | GWAS          | 0.20 | 0.15    | 1.43            | 1.21             | 1.70             | 4.27E-05       |
| G > A <sup>a</sup> | 17  | 54707917  | Replication I | 0.18 | 0.18    | 1.02            | 0.90             | 1.15             | 7.46E-01       |
| rs4789777          | 17  | 80394530  | GWAS          | 0.13 | 0.08    | 1.54            | 1.24             | 1.91             | 9.71E-05       |
| T > G <sup>a</sup> | 17  | 80394530  | Replication I | 0.10 | 0.10    | 1.01            | 0.87             | 1.19             | 8.62E-01       |
| rs670850           | 18  | 37290224  | GWAS          | 0.35 | 0.42    | 0.74            | 0.64             | 0.84             | 9.58E-06       |
| G > C <sup>a</sup> | 18  | 37290224  | Replication I | 0.38 | 0.37    | 1.01            | 0.92             | 1.11             | 8.14E-01       |
| rs7266311          | 20  | 55183614  | GWAS          | 0.10 | 0.14    | 0.65            | 0.53             | 0.79             | 3.13E-05       |
| A > G <sup>a</sup> | 20  | 55183614  | Replication I | 0.11 | 0.10    | 1.13            | 0.97             | 1.31             | 1.07E-01       |
| rs16980131         | 20  | 55183732  | GWAS          | 0.06 | 0.09    | 0.59            | 0.46             | 0.77             | 7.62E-05       |
| G > A <sup>a</sup> | 20  | 55183732  | Replication I | 0.08 | 0.07    | 1.05            | 0.88             | 1.25             | 6.06E-01       |
| rs991090           | 21  | 19533935  | GWAS          | 0.33 | 0.39    | 0.75            | 0.65             | 0.86             | 6.06E-05       |

(Continued)

| SNP                | CHR | BP       | Study         | MAF  |         | OR <sup>b</sup> | L95 <sup>b</sup> | U95 <sup>b</sup> | P <sup>b</sup> |
|--------------------|-----|----------|---------------|------|---------|-----------------|------------------|------------------|----------------|
|                    |     |          |               | Case | Control |                 |                  |                  |                |
| T > G <sup>a</sup> | 21  | 19533935 | Replication I | 0.35 | 0.34    | 1.08            | 0.98             | 1.18             | 1.45E-01       |
| rs79323515         | 21  | 33455653 | GWAS          | 0.11 | 0.15    | 0.68            | 0.56             | 0.82             | 8.22E-05       |
| C > T <sup>a</sup> | 21  | 33455653 | Replication I | 0.13 | 0.13    | 1.06            | 0.92             | 1.21             | 4.37E-01       |

<sup>a</sup>Major/Minor alleles

<sup>b</sup>Adjusted by age, gender and the first ten PC for GWAS and by age and gender for replications

\*P value < 0.05 and consistent with GWAS discovery phase

**Supplementary Table S3: Associations of other 3 SNPs in GWA scan and two validations**

| SNP                | Study          | Cases <sup>b</sup> | Controls <sup>b</sup> | MAF <sup>a</sup> |          | OR <sub>add</sub>     | P <sub>add</sub> |
|--------------------|----------------|--------------------|-----------------------|------------------|----------|-----------------------|------------------|
|                    |                |                    |                       | Cases            | Controls | (95% CI) <sup>c</sup> |                  |
| rs6983267          | GWAS           | 195/478/257        | 174/470/321           | 0.47             | 0.42     | 1.18(1.04–1.35)       | 1.24E-02         |
| 8q24.21            | Replication I  | 363/849/546        | 322/935/612           | 0.45             | 0.42     | 1.11(1.01–1.22)       | 2.88E-02         |
| G > A <sup>a</sup> | Replication II | 220/470/251        | 333/892/604           | 0.48             | 0.43     | 1.26(1.13–1.41)       | 4.73E-05         |
|                    | Combined All   |                    |                       |                  |          | 1.17(1.10–1.25)       | 7.17E-07         |
| rs10795668         | GWAS           | 100/388/440        | 137/405/415           | 0.32             | 0.35     | 0.85(0.74–0.97)       | 1.82E-02         |
| 10p14              | Replication I  | 227/758/774        | 279/839/743           | 0.34             | 0.38     | 0.88(0.80–0.97)       | 7.30E-03         |
| T > G <sup>a</sup> | Replication II | 94/402/447         | 239/821/771           | 0.31             | 0.35     | 0.83(0.74–0.93)       | 1.90E-03         |
|                    | Combined All   |                    |                       |                  |          | 0.86(0.80–0.91)       | 2.96E-06         |
| rs80273176         | GWAS           | 19/243/650         | 41/308/591            | 0.15             | 0.21     | 0.69(0.58–0.82)       | 2.00E-05         |
| 11q24.3            | Replication I  | 44/464/1239        | 56/548/1247           | 0.16             | 0.18     | 0.87(0.76–0.98)       | 2.23E-02         |
| C > T <sup>a</sup> | Replication II | 28/279/633         | 48/547/1238           | 0.18             | 0.18     | 1.02(0.88–1.19)       | 7.80E-01         |
|                    | Combined All   |                    |                       |                  |          | 0.85(0.69–1.04)       | 1.22E-01         |

<sup>a</sup>Major/minor alleles

<sup>b</sup>Variant homozygote/Heterozygote/Wild type homozygote

<sup>c</sup>Minor allele frequency (MAF)

OR<sub>add</sub>, P<sub>add</sub>: calculated by additive model adjusted for age, gender and first ten PC

**Supplementary Table S4: Results of haplotype association analysis on rs10035791, rs12522693 and rs80007597**

**Supplementary Table S5: All SNPs identified by the GWA scan or imputation analyses at 5q23.3 and 17q12 and their associations with CRC ( $P < 1.0 \times 10^{-4}$ )**

**Supplementary Table 6A: Results of differential expression analysis on genes within 1 Mb around the newly identified SNPs in two public databases**

**Supplementary Table S6B: Significant results ( $P < 0.05$ ) of eQTL analysis on rs17836917 and the expression of *CCL2*, *CCL7*, *CCL8*, *CCL13* and *CCL1***

**Supplementary Table S7: Summary of loci associated with CRC published previously and their association with CRC in our GWAS discovery phase**

| Published SNP           | Cytoband | Related Gene(s)          | $P^a$     | Source     | Ref  |
|-------------------------|----------|--------------------------|-----------|------------|------|
| rs1035209               | 10q24.2  | NKX2-3 - SLC25A28        | 5.19E-01  | Imputation | 11   |
| rs10411210              | 19q13.11 | RHPN2                    | 2.44E-01  | Imputation | 5    |
| rs10505477 <sup>c</sup> | 8q24.21  | SRRM1P1 - POU5F1B        | 1.62E-02* | Genotype   | 4,11 |
| rs10774214 <sup>b</sup> | 12p13.32 | CCND2                    | 2.54E-03* | Imputation | 13   |
| rs10795668 <sup>c</sup> | 10p14    | KRT8P16 - TCEB1P3        | 1.82E-02* | Genotype   | 7    |
| rs10849432 <sup>b</sup> | 12p13.31 | CD9, PLEKHG6, TNFRSF1A   | 5.75E-01  | Genotype   | 13   |
| rs10936599              | 3q26.2   | MYNN                     | 6.54E-03* | Imputation | 5    |
| rs11169552              | 12q13.12 | DIP2B - ATF1             | 4.44E-01  | Imputation | 5    |
| rs11196172 <sup>b</sup> | 10q25.2  | TCF7L2                   | 9.59E-01  | Imputation | 13   |
| rs11255841              | 10p14    | GATA3                    | 6.67E-03* | Imputation | 11   |
| rs11903757              | 2q32.3   | NABP1 - SDPR             | 5.88E-01  | Imputation | 10   |
| rs12603526 <sup>b</sup> | 17p13.3  | NXN                      | 2.29E-01  | Genotype   | 13   |
| rs1321311               | 6p21.2   | SRSF3 - CDKN1A           | 3.42E-02* | Genotype   | 9    |
| rs174537 <sup>b</sup>   | 11q12.2  | MYRF, FEN1, FADS1, FADS2 | 8.24E-01  | Imputation | 13   |
| rs1800469 <sup>b</sup>  | 19q13.2  | TGFB1, B9D2              | 3.13E-01  | Imputation | 13   |
| rs2423279 <sup>b</sup>  | 20p12.3  | HAO1                     | 2.47E-02* | Imputation | 13   |
| rs2427308               | 20q13.33 | LAMA5                    | 9.38E-01  | Imputation | 11   |
| rs34245511              | 12q13.12 | DIP2B, ATF1              | 8.23E-01  | Imputation | 11   |
| rs3802842               | 11q23.1  | C11orf93                 | 2.13E-01  | Imputation | 6    |
| rs3824999               | 11q13.4  | POLD3                    | 5.20E-01  | Imputation | 9    |
| rs4444235               | 14q22.2  | RPS3AP46 - BMP4          | 5.66E-01  | Genotype   | 5    |
| rs4779584               | 15q13.3  | SCG5, GREM1              | 4.29E-01  | Genotype   | 12   |
| rs4925386               | 20q13.33 | LAMA5                    | 3.17E-01  | Genotype   | 5    |
| rs4939827               | 18q21.1  | SMAD7                    | 1.33E-01  | Genotype   | 2    |
| rs6469656 <sup>b</sup>  | 8q23.3   | LINC00536 - EIF3H        | 2.00E-01  | Imputation | 13   |
| rs647161 <sup>b</sup>   | 5q31.1   | PITX1                    | 1.16E-01  | Imputation | 14   |
| rs6687758 <sup>b</sup>  | 1q41     | DUSP10 - CICP13          | 3.41E-01  | Imputation | 5    |

(Continued)

| Published SNP          | Cytoband | Related Gene(s)   | <i>P</i> <sup>a</sup> | Source     | Ref |
|------------------------|----------|-------------------|-----------------------|------------|-----|
| rs6691170              | 1q41     | DUSP10 - CICP13   | 2.35E-02*             | Imputation | 5   |
| rs6983267 <sup>c</sup> | 8q24.21  | SRRM1P1 - POU5F1B | 1.24E-02*             | Genotype   | 10  |
| rs7014346              | 8q24.21  | SRRM1P1 - POU5F1B | 4.34E-01              | Genotype   | 6   |
| rs704017 <sup>b</sup>  | 10q22.3  | ZMIZ1, AS1        | 4.93E-02*             | Genotype   | 13  |
| rs7229639 <sup>b</sup> | 18q21.1  | SMAD7             | 8.26E-02              | Genotype   | 13  |
| rs73376930             | 15q13.3  | GREM1, SCG5       | 8.63E-02              | Genotype   | 11  |
| rs961253               | 20p12.3  | TARDBPP1 - BMP2   | 1.11E-01              | Genotype   | 5   |
| rs9929218              | 16q22.1  | CDH1              | 9.87E-01              | Genotype   | 5   |

<sup>a</sup>*P* value of GWAS discovery phase adjusted by gender, age and first ten PC

<sup>b</sup>Thirteen loci identified in Eastern Asian population

<sup>c</sup>SNPs involved in replication I (rs10505477 was excluded from replication because of its high linkage with rs6983267 in our GWAS control data:  $r^2=0.979$ )

\**P* value < 0.05

### Supplementary Table S8: SNPs that met the criteria in GWAS discovery phases but had strong linkage disequilibrium ( $r^2 > 0.8$ ) with replicated SNPs in the replication stage I

| SNP        | CHR | BP        | A1 <sup>a</sup> | OR   | L95  | U95  | <i>P</i> <sup>b</sup> | Replicated SNP | PSNP <sup>c</sup> | <i>r</i> <sup>2</sup> |
|------------|-----|-----------|-----------------|------|------|------|-----------------------|----------------|-------------------|-----------------------|
| rs2438472  | 5   | 5605830   | G               | 0.52 | 0.38 | 0.71 | 4.63E-05              | rs413665       | 3.78E-05          | 1.00                  |
| rs2455476  | 5   | 5606066   | T               | 0.52 | 0.38 | 0.71 | 4.95E-05              | rs413665       | 3.78E-05          | 1.00                  |
| rs3798492  | 6   | 100888625 | T               | 0.76 | 0.66 | 0.86 | 3.68E-05              | rs3778032      | 2.88E-05          | 0.99                  |
| rs3778030  | 6   | 100906046 | T               | 0.77 | 0.67 | 0.87 | 8.04E-05              | rs3778032      | 2.88E-05          | 0.97                  |
| rs10792172 | 11  | 58318056  | C               | 0.75 | 0.66 | 0.86 | 5.03E-05              | rs2509928      | 3.54E-05          | 0.88                  |
| rs2509920  | 11  | 58336544  | C               | 0.76 | 0.66 | 0.87 | 7.04E-05              | rs2509928      | 3.54E-05          | 0.97                  |
| rs11627784 | 14  | 40229840  | G               | 0.66 | 0.55 | 0.80 | 1.56E-05              | rs12886318     | 9.05E-06          | 0.94                  |

<sup>a</sup>Minor alleles

<sup>b</sup>Adjusted by age, gender and the first ten PC

<sup>c</sup>*P* values of replicated SNP adjusted by age, gender and the first ten PC
